# Supplementary material
Source: Research Square preprint supplement (doi:10.21203/rs.3.rs-9271553/v1)
Supplement: Supplementary file 1 [file d1f88b03c0509a2beb2085ec.xlsx]

## Sheet: Table 1 ARTICLE_v3
Genus	Species	Name originally registered in the Data Portal (if different)	Author citation	Currently accepted country name	Verbatim label locality	NHMUK Registration number	NHM Data Portal link	SketchFab 3D model link	TYPE	Specimen label description
Biomphalaria	alexandrina		Ehrenberg, 1831	Egypt	drain near airport, Alexandria, Egypt	20041589	Collection specimens - Specimens - 20041589 - Data Portal	https://skfb.ly/pHR8x		Biomphalaria alexandrina (Ehrenberg, 1831). NHMUK 20041589 (drain near airport, Alexandria, Egypt)
Biomphalaria	barthi		Brown, 1973	Ethiopia	Assaita village, Harar Province, Ethiopia	1974041	Collection specimens - Specimens - 1974041 - Data Portal	https://skfb.ly/pHR8K	HOLOTYPE	Biomphalaria barthi (Brown, 1973). NHMUK 1974041, HOLOTYPE (Assaita village, Harar Province, Ethiopia)
Biomphalaria	camerunensis		Boettger, 1941	Cameroon	N'Dop plain, Cameroon	20041591	Collection specimens - Specimens - 20041591 - Data Portal	https://skfb.ly/pHR8Q		Biomphalaria camerunensis (Boettger, 1941). NHMUK 20041591 (N'Dop plain, Cameroon)
Biomphalaria	choanomphala		Martens, 1897	Kenya	Dredged c. 2m depth, Kendi Bay, Lake Victoria, Kenya	20041586	Collection specimens - Specimens - 20041586 - Data Portal	https://skfb.ly/pHR8X		Biomphalaria choanomphala (Martens, 1897). NHMUK 20041586 (Dredged c. 2m depth, Kendi Bay, Lake Victoria, Kenya)
Biomphalaria	pfeifferi		Krauss, 1848	Kenya	Eldoret, Kenya	20041584	Collection specimens - Specimens - 20041584 - Data Portal	https://skfb.ly/pHRs7		Biomphalaria pfeifferi (Krauss, 1848). NHMUK 20041584 (Eldoret, Kenya)
Biomphalaria	smithi		Preston, 1910	Uganda or DRC	Lake Albert Edward	1909.8.25.66-77	Collection specimens - Specimens - 1909.8.25.66-77 - Data Portal	https://skfb.ly/pHRst	SYNTYPES	Biomphalaria smithi (Preston, 1910). NHMUK 1909.8.25.66-77, SYNTYPES (Lake Albert Edward)
Biomphalaria	stanleyi		Smith, 1888	Uganda	Lake Albert, at Butiaba, Uganda	20041587	Collection specimens - Specimens - 20041587 - Data Portal	https://skfb.ly/pHBKF		Biomphalaria stanleyi (Smith, 1888). NHMUK 20041587, (Lake Albert, at Butiaba, Uganda)
Biomphalaria	sudanica		Martens, 1870	Uganda	Swamo Bundibuggio, Uganda	20041605	Collection specimens - Specimens - 20041605 - Data Portal	https://skfb.ly/pHRsI		Biomphalaria sudanica (Martens, 1870). NHMUK 20041605 (Swamo Bundibuggio, Uganda)
Bulinus	abyssinicus		E. von Martens, 1866	Ethiopia	Assaita village, Harar Province, Ethiopia	20041668	Collection specimens - Specimens - 20041668 - Data Portal	https://skfb.ly/pHRsK		Bulinus abyssinicus (E. von Martens, 1866). NHMUK 20041668 (Assaita, Ethiopia)
Bulinus	africanus		Krauss, 1848	South Africa	Avoca, N. Durban, South Africa	20041663	Collection specimens - Specimens - 20041663 - Data Portal	https://skfb.ly/pHRsP		Bulinus africanus (Krauss, 1848). NHMUK 20041663, (Avoca, N. Durban, South Africa)
Bulinus	bavayi		Dautzenberg, 1895	Seychelles	Cing Case, South Island, Aldabra atoll	20041687	Collection specimens - Specimens - 20041687 - Data Portal	https://skfb.ly/pHRsY		Bulinus bavayi (Dautzenberg, 1895). NHMUK 20041687 (Cing Case, South Island, Aldabra atoll)
Bulinus	beccarii		Paladilhe, 1872	Yemen (previously South Yemen)	West Aden Protectorate, Wadi Hassan at Dirgag, Abyan. Fahdi, South Yemen	20041685	Collection specimens - Specimens - 20041685 - Data Portal	https://skfb.ly/pHRtn		Bulinus beccarii (Paladilhe, 1872). NHMUK 20041685 (West Aden Protectprate, Wadi Hassan at Dirgag, Abyan. Fahdi, South Yemen)
Bulinus	camerunensis		Mandahl-Barth, 1957	Cameroon	Lake Boarombi Kotto, Kumba, Cameroon	20041684	Collection specimens - Specimens - 20041684 - Data Portal	https://skfb.ly/pHRtp		Bulinus camerunensis (Mandahl-Barth, 1957). NHMUK 20041684 (Lake Boarombi Kotto, Kumba, Cameroon)
Bulinus	cernicus		Morelet, 1867	Mauritius	Cite La Cure near Port Louis, Mauritius	20041686	Collection specimens - Specimens - 20041686 - Data Portal	https://skfb.ly/pHRt7		Bulinus cernicus (Morelet, 1867). NHMUK 20041686 (Cite La Cure near Port Louis, Mauritius)
Bulinus	forskalii		Ehrenberg, 1831	Egypt	Drain west of Kafi Haris, Qalyubiya, Egypt	20041680	Collection specimens - Specimens - 20041680 - Data Portal	https://skfb.ly/pHRtx		Bulinus forskalii (Ehrenberg, 1831). NHMUK 20041680 (drain west of Kafi Haris, Qalyubiya, Egypt)
Bulinus	globosus		Morelet, 1866	Angola	Luanda Province, Rio Lifune, Angola	20041669	Collection specimens - Specimens - 20041669 - Data Portal	https://skfb.ly/pHRtK		Bulinus globosus (Morelet, 1866). NHMUK 20041669 (Luanda Province, Rio Lifune, Angola)
Bulinus	jousseaumei		Dautzenberg, 1890	The Gambia	Diabugu Basilla, Gambia	20041667	Collection specimens - Specimens - 20041667 - Data Portal	https://skfb.ly/pHRtN		Bulinus jousseaumei (Dautzenberg, 1890). NHMUK 20041667 (Diabugu Basilla, Gambia)
Bulinus	nasutus nasutus	Bulinus nasutus	E. von Martens, 1879	Kenya	In Pool. South coast, 0.5 miles north of Gazi on Main Roa, Kanya	20041665	Collection specimens - Specimens - 20041665 - Data Portal	https://skfb.ly/pHRtT		Bulinus nasutus (E. von Martens, 1879). NHMUK 20041665 (In Pool. South coast, 0.5 miles north of Gazi on Main Road, Kenya)
Bulinus	nasutus productus	Physopsis nasutus	Mandahl-Barth, 1960	Kenya	Kano plain near Kisumu, Kenya	20041664	Collection specimens - Specimens - 20041664 - Data Portal	https://skfb.ly/pHRtU		Bulinus nasutus productus (Mandahl-Barth, 1960). NHMUK 20041664 (Kano plain near Kisumu, Kenya)
Bulinus	natalensis		Küster, 1841	Zambia	Lunuku River, Kafalabar, Zambia	1945.8.23.62-73	Collection specimens - Specimens - 1945.8.23.62-73 - Data Portal	https://skfb.ly/pHRtX		Bulinus natalensis (Küster, 1841). NHMUK 1945.8.23.62-73 (Lunuku River, Kafalabar, Zambia)
Bulinus	nyassanus	Physa nyassana	E. A. Smith, 1878	Tanzania or Malawi or Mozambique	Lake Nyassa	1877.9.28.27	Collection specimens - Specimens - 1877.9.28.27 - Data Portal	https://skfb.ly/pHR9n	SYNTYPES	Physa nyassana (E. A. Smith, 1878). NHMUK 1877.9.28.27, SYNTYPES (Lake Nyassa)
Bulinus	obtusispira		E. A. Smith, 1882	Madagascar	Lower Mangoky river region, Tanandava, Madagascar	20041671	Collection specimens - Specimens - 20041671 - Data Portal	https://skfb.ly/pHR9o		Bulinus obtusispira (E. A. Smith, 1882). NHMUK 20041671 (Lower Mangoky river region, Tanandava, Madagascar)
Bulinus	senegalensis		O. F. Müller, 1781	The Gambia	Njoren pool, Bansang, MacCarthey Island Division, Gambia	20041682	Collection specimens - Specimens - 20041682 - Data Portal	https://skfb.ly/pHR9t		Bulinus senegalensis (O. F. Müller, 1781). NHMUK 20041682 (Njoren pool, Bansang, MacCarthey Island Division, Gambia)
Bulinus	truncatus	Bulinus rohlfsi	Clessin, 1886	Ghana	Ghana	20041677	Collection specimens - Specimens - 20041677 - Data Portal	https://skfb.ly/pHR9w		Bulinus rohlfsi (Clessin, 1886). NHMUK 20041677 (Ghana)
Bulinus	truncatus		Audouin, 1827	Sudan	Between Merga and El Atrun, Dafur, Sudan	20041742	Collection specimens - Specimens - 20041742 - Data Portal	https://skfb.ly/pHR9C		Bulinus truncatus (Audouin, 1827). NHMUK 20041742 (Between Merga and El Atrun, Dafur, Sudan)
Bulinus	umbilicatus		Mandahl-Barth, 1973	Sudan	Abata, Jebel Marra Region, Zalingei, Sudan	20041670	Collection specimens - Specimens - 20041670 - Data Portal	https://skfb.ly/pHR9E		Bulinus umbilicatus (Mandahl-Barth, 1973). NHMUK 20041670 (Abata, Jebel Marra Region, Zalingei, Sudan)
Bulinus	wrighti		Mandahl-Barth, 1965	Yemen	Samh ba Rooh village, nearest police Mark A3, Al-Harj in Raidal-al-Sa-ar area, E. Aden Protectorate	20041689	Collection specimens - Specimens - 20041689 - Data Portal	https://skfb.ly/pHR9I		Bulinus reticulatus wrighti (Mandahl-Barth, 1965). NHMUK 20041689 (Samh ba Rooh village, nearest police Mark A3, Al-Harj in Raidal-al-Sa-ar area, E. Aden Protectorate)
